# Supplementary material for: Pattern of Mitochondrial Respiration in Peripheral Blood Cells of Patients with Parkinson’s Disease
Source: MDPI journal article supplement (doi:10.3390/ijms231810863), 2022-09-17

**Supplementary Figure S1**

Representative Western blot analysis using antibodies against  $\beta$ -actin on protein extracts from PBMCs of a group of PD and controls.

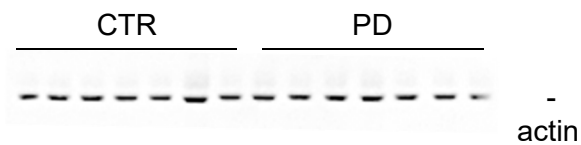

Supplement: s1 [file s1]
